# Supplementary material
Source: PubMed Central journal article supplement (PMC3067414)
Supplement: supp_77_7_2445__1.pdf [file supp_77_7_2445__1.pdf]

**Table S1.** Accession numbers for DNA sequences used in this study

|                | <i>recA</i>              | <i>mdh</i>               | <i>katA</i>               | <i>luxR-I</i><br>intergenic | <i>glpA-fdhA</i><br>intergenic       |
|----------------|--------------------------|--------------------------|---------------------------|-----------------------------|--------------------------------------|
| <b>CG101</b>   | HQ595306                 | EU907966.1               | EU907990.1                | HQ436471                    | HQ535993                             |
| <b>CG103</b>   | HQ595307                 | HQ595322                 | HQ595331                  | HQ436472                    | HQ535994                             |
| <b>EM17</b>    | HQ595308                 | EU907967.1               | EU907991.1                | HQ436484                    | HQ535997                             |
| <b>ES114</b>   | VF_0535 <sup>a</sup>     | VF_0276 <sup>a</sup>     | VF_A0009 <sup>a</sup>     | HQ436469                    | CP000021.2<br>(bp 279820-<br>279517) |
| <b>ES12</b>    | HQ595309                 | HQ595323                 | HQ595332                  | HQ436480                    | HQ535986                             |
| <b>ES213</b>   | HQ595310                 | EU907971.1               | EU907995.1                | HQ436481                    | HQ535984                             |
| <b>ES401</b>   | HQ595311                 | HQ595324                 | HQ595333                  | HQ436483                    | HQ535991                             |
| <b>ET101</b>   | HQ595312                 | HQ595325                 | HQ595334                  | HQ436475                    | HQ535999                             |
| <b>ET401</b>   | HQ595313                 | HQ595326                 | HQ595335                  | HQ436476                    | HQ535990                             |
| <b>H905</b>    | HQ595314                 | EU907972.1               | EU907996.1                | HQ436478                    | HQ535998                             |
| <b>MJ1S</b>    | HQ595315                 | HQ595327                 | HQ595336                  | HQ436470                    | HQ535987                             |
| <b>MJ11</b>    | VFMJ11_0538 <sup>a</sup> | VFMJ11_0264 <sup>a</sup> | VFMJ11_A0023 <sup>a</sup> | HQ436479                    | CP001133.1<br>(bp 321512-<br>321209) |
| <b>MJ1</b>     | HQ595316                 | HQ595328                 | HQ595337                  | HQ436485                    | HQ535996                             |
| <b>PP3</b>     | HQ595317                 | HQ595329                 | HQ595338                  | HQ436468                    | HQ535988                             |
| <b>SA1</b>     | HQ595318                 | EU907986.1               | EU908010.1                | HQ436473                    | HQ535992                             |
| <b>SR5</b>     | HQ595319                 | EU907987.1               | EU908011.1                | HQ436482                    | HQ535985                             |
| <b>VLS2</b>    | HQ595320                 | HQ595330                 | HQ595339                  | HQ436477                    | HQ535995                             |
| <b>WH1</b>     | HQ595321                 | EU907988.1               | EU908012.1                | HQ436474                    | HQ535989                             |
| <b>LF11238</b> | VSAL_I0634 <sup>a</sup>  | VSAL_I0359 <sup>a</sup>  | VSAL_II0215 <sup>a</sup>  | NA <sup>b</sup>             | FM178380.1<br>(bp 445307-<br>445005) |

<sup>a</sup> Locus tag of full gene given in table; partial sequence used for alignment.

<sup>b</sup> NA indicates “not applicable” – this sequence was too divergent to provide a reasonable alignment and was not included in phylogenetic reconstructions
